# Supplementary figures and images for: Hydrothermal Synthesis of Fluorapatite Coatings over Titanium Implants for Enhanced Osseointegration—An In Vivo Study in the Rabbit
Source: MDPI journal article supplement (doi:10.3390/jfb13040241), 2022-11-14

## Supplementary Materials

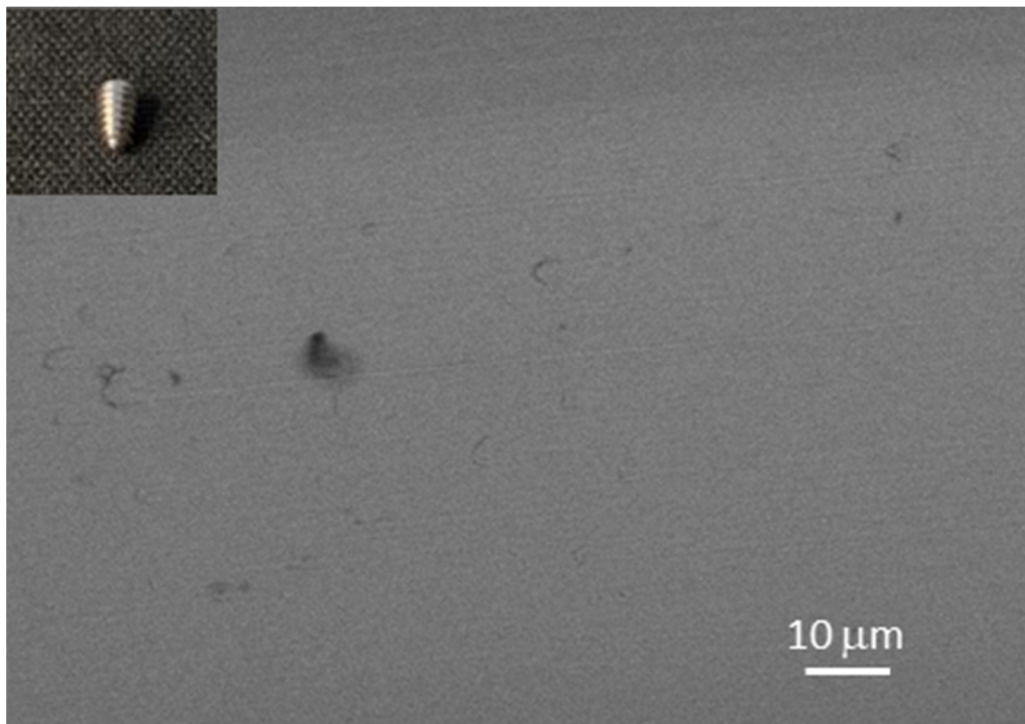

**Figure S1.** SEM image of uncoated titanium implant.

Supplement: s1 [file s1]
